# Supplementary material for: Skeletal and Cardiac Rhabdomyolysis in a Live-Stranded Neonatal Bryde's Whale With Fetal Distress
Source: Front Vet Sci. 2019 Dec 20;6:476. doi: 10.3389/fvets.2019.00476 (PMC6933440; doi:10.3389/fvets.2019.00476)
Supplement: Supplementary file 1 [file Table_1.XLSX]

## Sheet: SUPPLEMENTARY TABLE 1
	Supplementary Table 1. Summary of the immunohistochemical methodology used in this study.
	ANTIGEN RETRIEVAL	SERUM	SOURCE	DILUTION	PRIMARY ANTIBODY	SOURCE	HOST	TYPE	DILUTION	SECONDARY ANTIBODY	SOURCE	DILUTION
	Citrate buffer (1)	Swine serum (3)	Dako (4)	10% (5)	Myoglobin (6)	Abcam (10)	Rabbit	Polyclonal	1 in 200 (11)	Polyclonal Swine Anti-Rabbit Immunoglobulins (15)	Dako (4)	1 in 200 (16)
	Citrate buffer (1)	Swine serum (3)	Dako (4)	10% (5)	Fibrinogen (7)	Abcam (10)	Rabbit	Polyclonal	1 in 50 (12)	Polyclonal Swine Anti-Rabbit Immunoglobulins (15)	Dako (4)	1 in 200 (16)
	Citrate buffer (2)	Swine serum (3)	Dako (4)	10% (5)	Troponin I (8)	Abcam (10)	Rabbit	Polyclonal	1 in 25 (13)	Polyclonal Swine Anti-Rabbit Immunoglobulins (15)	Dako (4)	1 in 200 (16)
	Citrate buffer (2)	Swine serum (3)	Dako (4)	10% (5)	Troponin C (9)	Abcam (10)	Rabbit	Monoclonal	1 in 250 (14)	Polyclonal Swine Anti-Rabbit Immunoglobulins (15)	Dako (4)	1 in 100 (17)
	Detail of the immunohistochemical protocol used in this study. (1) Citrate buffer, pH 6.0, 7 minutes at 96ºC. (2) Citrate buffer, pH 6.0, 20 minutes at 100ºC. (3) Dako Swine serum (Normal) (X090110-8). (4) Dako (Glostrup, Denmark). (5) Dilution of 10 µl of serum in 90 µl of PBS and incubated in a humidity chamber for half an hour. (6) Anti-Myoglobin antibody (ab187506). (7) Anti-Fibrinogen antibo…
